# Supplementary material for: Poly(tannic acid) nanocoating based surface modification for construction of multifunctional composite CeO2NZs to enhance cell proliferation and antioxidative viability of preosteoblasts
Source: Royal Society of Chemistry journal article supplement (doi:10.1039/d1nr02799a), 2021-01-01
Supplement: d1nr02799a1.pdf [file d1nr02799a1.pdf]

## Supporting Information

### **Poly(tannic acid) nanocoating based surface modification for construction of multifunctional composite ceria nanozymes to enhance cell proliferation and antioxidative viability of preosteoblasts**

*Shuoshuo Yang, Jiale Ji, Mengwei Luo, Hailing Li\* and Zhonghong Gao\**

Shuoshuo Yang

Hubei Key Laboratory of Bioinorganic Chemistry & Materia Medica, School of Chemistry and Chemical Engineering, Huazhong University of Science & Technology, Wuhan, 430074, P. R. China.

Jiale Ji

School of Chemistry and Chemical Engineering, Huazhong University of Science & Technology, Wuhan, 430074, P. R. China.

Mengwei Luo

School of Chemistry and Chemical Engineering, Huazhong University of Science & Technology, Wuhan, 430074, P. R. China.

Dr Hailing Li

Hubei Key Laboratory of Bioinorganic Chemistry & Materia Medica, School of Chemistry and Chemical Engineering, Huazhong University of Science & Technology, Wuhan, 430074, P. R. China. E-mail: [lihailing86@hust.edu.cn](mailto:lihailing86@hust.edu.cn)

Dr Zhonghong Gao

Hubei Key Laboratory of Bioinorganic Chemistry & Materia Medica, School of Chemistry and Chemical Engineering, Huazhong University of Science & Technology, Wuhan, 430074, P. R. China. E-mail: [zhgao144@hust.edu.cn](mailto:zhgao144@hust.edu.cn)

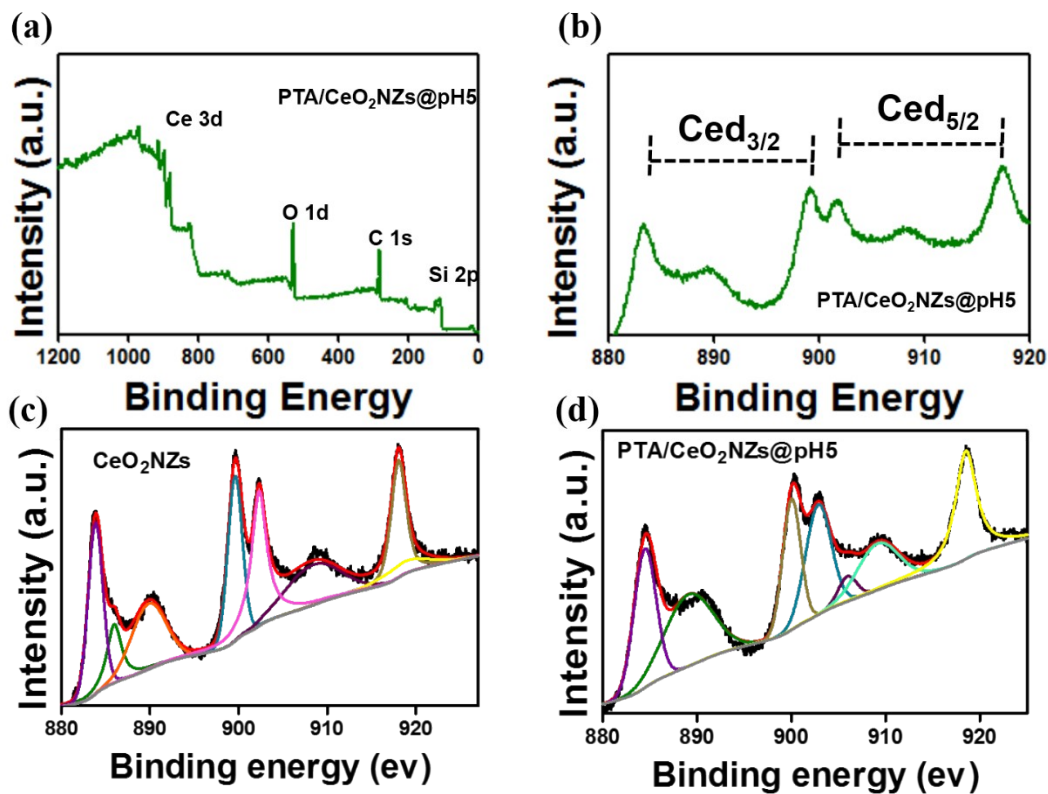

**Fig. S1.** (a) and (b) XPS survey spectrum of PTA/CeO<sub>2</sub>NZs@pH5. (c) XPS peak fitting of CeO<sub>2</sub>NZs. (d) XPS peak fitting of PTA/CeO<sub>2</sub>NZs@pH5.

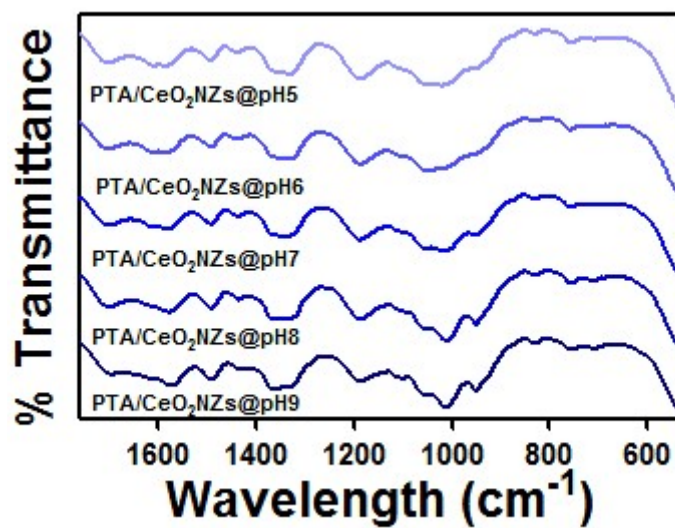

**Fig. S2.** FTIR-ATR spectra of PTA/CeO<sub>2</sub>NZs@pH=5 to 9.

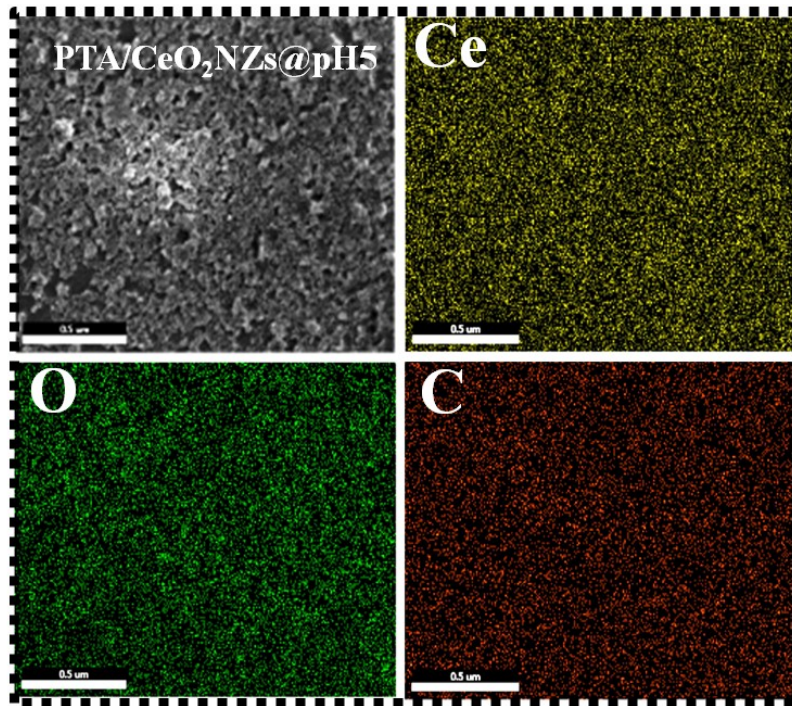

Fig. S3. EDS Analysis with SEM for PTA/CeO<sub>2</sub>NZs@pH5.

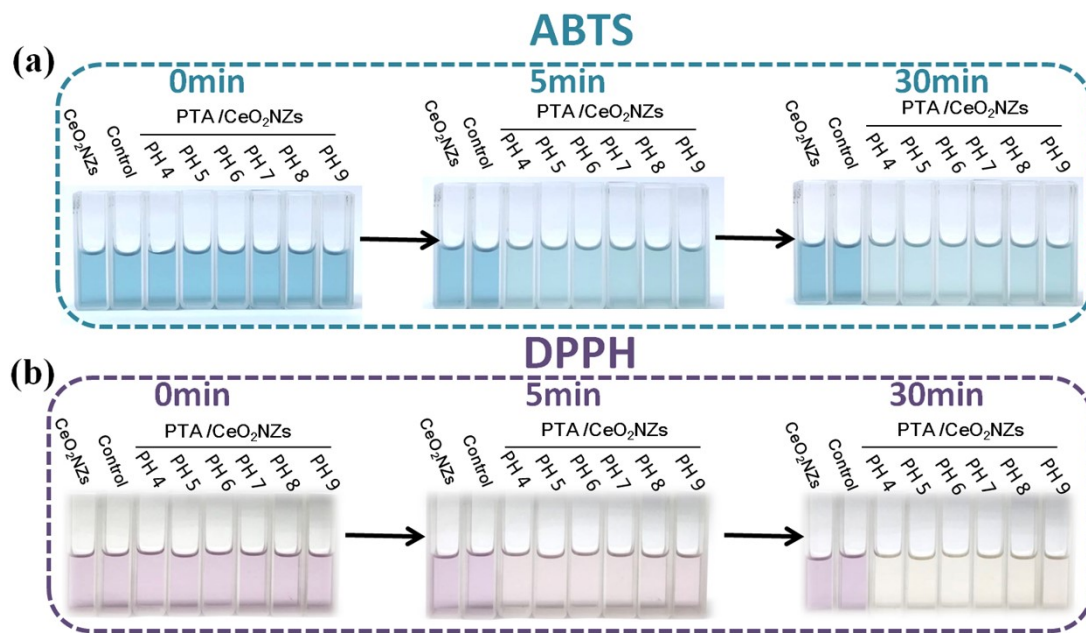

Fig. S4. Photographs of radical scavenging test of (a) DPPH and (b) ABTS at 0 min, 5min, 30min.

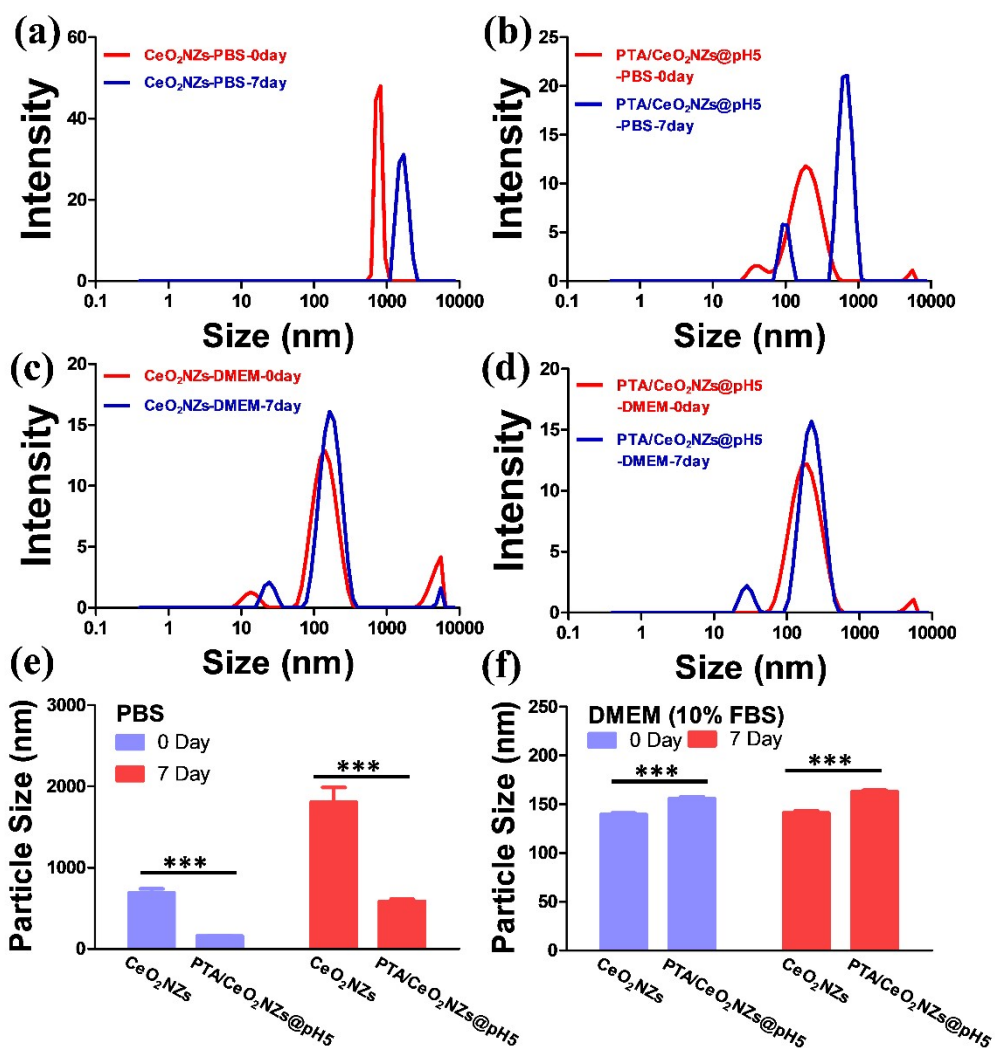

**Fig. S5.** Stability of  $\text{CeO}_2\text{NZs}$  and  $\text{PTA/CeO}_2\text{NZs@pH5}$ . The size distribution of  $\text{CeO}_2\text{NZs}$  in (a) PBS and (c) DMEM solutions (10% FBS) for 1 week. The size distribution of  $\text{PTA/CeO}_2\text{NZs@pH5}$  in (b) PBS and (d) DMEM solutions (10% FBS) for 1 week. (e) the particle sizes of  $\text{CeO}_2\text{NZs}$  and  $\text{PTA/CeO}_2\text{NZs@pH5}$  in PBS solution (0 day and 7 days). (f) the particle sizes of  $\text{CeO}_2\text{NZs}$  and  $\text{PTA/CeO}_2\text{NZs@pH5}$  in DMEM solution (0 day and 7 days).

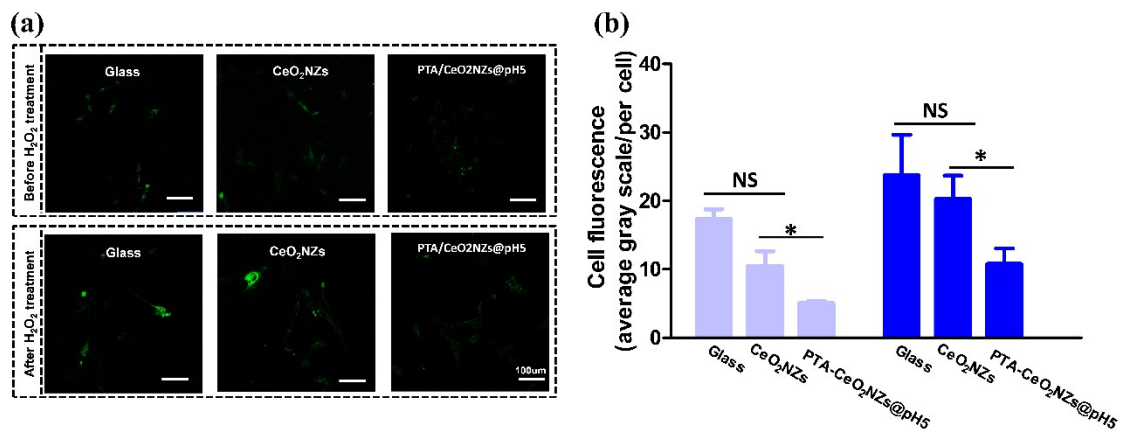

**Fig. S6.** (a) Fluorescence microscopy images of ROS detector inside CeO<sub>2</sub>NZs and PTA/CeO<sub>2</sub>NZs@pH=5 treated Mc3t3-E1 cells before and after 200 µM H<sub>2</sub>O<sub>2</sub> treatment for 4 h. (b) Cell fluorescence: mean gray scale per cell.
